# Supplementary material
Source: PubMed Central journal article supplement (PMC11626269)
Supplement: ajcr0014-5427-f2.pdf [file ajcr0014-5427-f2.pdf]

## MRD in NSCLC

**Supplementary Table 1.** Baseline characteristic measurements

| Characteristics                                                                                                             | N | % |
|-----------------------------------------------------------------------------------------------------------------------------|---|---|
| Total                                                                                                                       |   |   |
| Gender                                                                                                                      |   |   |
| Male                                                                                                                        |   |   |
| Female                                                                                                                      |   |   |
| Age                                                                                                                         |   |   |
| > 60                                                                                                                        |   |   |
| < 60                                                                                                                        |   |   |
| Smoking                                                                                                                     |   |   |
| Yes                                                                                                                         |   |   |
| No                                                                                                                          |   |   |
| Histology                                                                                                                   |   |   |
| Squamous-cell carcinoma                                                                                                     |   |   |
| Adenocarcinoma                                                                                                              |   |   |
| Adeno-squamous carcinoma                                                                                                    |   |   |
| Large cell carcinoma                                                                                                        |   |   |
| Stage                                                                                                                       |   |   |
| IA1                                                                                                                         |   |   |
| IA2                                                                                                                         |   |   |
| IA3                                                                                                                         |   |   |
| IB                                                                                                                          |   |   |
| IIA                                                                                                                         |   |   |
| EGFR mutation                                                                                                               |   |   |
| Without (EGFR-)                                                                                                             |   |   |
| With (EGFR+)                                                                                                                |   |   |
| Subtypes of EGFR mutation                                                                                                   |   |   |
| EGFR exon 19 deletion (19del)                                                                                               |   |   |
| EGFR L858R                                                                                                                  |   |   |
| G719A/C/S                                                                                                                   |   |   |
| S768I                                                                                                                       |   |   |
| Others (N468K, E709A, N771delinsGY, H870R, P772_H773dup, I740_K745dup, V774M, A767_V769dup, R451H, D761Y and amplification) |   |   |
| At least two EGFR mutation subtypes                                                                                         |   |   |
| ctDNA analysis                                                                                                              |   |   |
| Negative                                                                                                                    |   |   |
| Positive                                                                                                                    |   |   |
| Postoperative therapy (Adjuvant therapy)                                                                                    |   |   |
| Targeted therapy                                                                                                            |   |   |
| Chemotherapy                                                                                                                |   |   |
